# Supplementary material for: Complex relationship between TAS2 receptor variations, bitterness perception, and alcohol consumption observed in a population of wine consumers
Source: Royal Society of Chemistry journal article supplement (doi:10.1039/c8fo01578c), 2019-01-01
Supplement: c8fo01578c1.pdf [file c8fo01578c1.pdf]

Supplemental Table 1. Association of non-bitterness variants with perceived bitterness and alcohol consumption

| Perceived bitterness in:    |                                     | Alcohol consumption         | black coffee preference     | Reference                       |
|-----------------------------|-------------------------------------|-----------------------------|-----------------------------|---------------------------------|
| brussels sprouts            | PROP                                |                             |                             |                                 |
| 0.03 (-0.03, 0.09) p=0.372  | -0.04 (-0.29, 0.2) p=0.721          | 0.08 (-0.17, 0.33) p=0.548  | 0.16 (-0.09, 0.41) p=0.216  | (Keller <i>et al.</i> 2012)     |
| 0 (-0.07, 0.06) p=0.884     | <b>-0.29 (-0.55, -0.03) p=0.029</b> | 0.14 (-0.12, 0.4) p=0.288   | -0.26 (-0.52, 0) p=0.049    | (Fayzullina <i>et al.</i> 2015) |
| 0.04 (-0.03, 0.1) p=0.293   | -0.27 (-0.54, 0) p=0.051            | -0.17 (-0.43, 0.1) p=0.223  | -0.02 (-0.29, 0.24) p=0.868 | (Fayzullina <i>et al.</i> 2015) |
| -0.03 (-0.1, 0.04) p=0.395  | 0 (-0.28, 0.28) p=0.983             | 0 (-0.28, 0.29) p=0.976     | 0.03 (-0.25, 0.32) p=0.812  | (Landgren <i>et al.</i> 2011)   |
| 0 (1, 1) p=1                | 0 (1, 1) p=1                        | 0 (1, 1) p=1                | 0 (1, 1) p=1                | (Landgren <i>et al.</i> 2011)   |
| 0.03 (-0.04, 0.09) p=0.424  | 0 (-0.25, 0.25) p=0.985             | 0.24 (-0.02, 0.5) p=0.075   | -0.04 (-0.3, 0.21) p=0.738  | (Landgren <i>et al.</i> 2011)   |
| -0.03 (-0.1, 0.05) p=0.489  | -0.15 (-0.44, 0.14) p=0.304         | -0.05 (-0.35, 0.25) p=0.755 | 0.3 (0.02, 0.6) p=0.039     | (Landgren <i>et al.</i> 2011)   |
| 0.08 (-0.05, 0.22) p=0.235  | -0.41 (-0.97, 0.13) p=0.145         | -0.26 (-0.8, 0.28) p=0.346  | -0.39 (-0.9, 0.13) p=0.14   | (Landgren <i>et al.</i> 2011)   |
| -0.03 (-0.15, 0.08) p=0.587 | 0.21 (-0.24, 0.66) p=0.359          | -0.22 (-0.68, 0.25) p=0.365 | -0.04 (-0.51, 0.43) p=0.852 | (Landgren <i>et al.</i> 2011)   |
| 0.05 (-0.02, 0.11) p=0.161  | -0.22 (-0.48, 0.04) p=0.095         | 0.06 (-0.2, 0.33) p=0.65    | -0.03 (-0.29, 0.23) p=0.807 | (Fushan <i>et al.</i> 2010)     |
| -0.06 (-0.16, 0.04) p=0.22  | 0.17 (-0.22, 0.56) p=0.39           | 0.01 (-0.37, 0.4) p=0.956   | 0.14 (-0.25, 0.53) p=0.486  | (Pirastu <i>et al.</i> 2015)    |
| -0.02 (-0.12, 0.07) p=0.627 | 0.25 (-0.13, 0.63) p=0.2            | 0.05 (-0.34, 0.44) p=0.791  | 0.14 (-0.26, 0.54) p=0.503  | (McRae <i>et al.</i> 2011)      |
| -0.03 (-0.14, 0.08) p=0.576 | 0.14 (-0.29, 0.58) p=0.52           | 0.17 (-0.27, 0.61) p=0.452  | 0.13 (-0.32, 0.59) p=0.579  | (Jaeger <i>et al.</i> 2012)     |
| 0.01 (-0.06, 0.07) p=0.867  | 0.05 (-0.22, 0.31) p=0.736          | 0 (-0.27, 0.27) p=0.998     | -0.24 (-0.51, 0.03) p=0.083 | (Jaeger <i>et al.</i> 2012)     |
| 0.05 (-0.03, 0.14) p=0.233  | 0.28 (-0.06, 0.62) p=0.11           | 0.18 (-0.17, 0.53) p=0.317  | 0.23 (-0.12, 0.58) p=0.204  | (Knaapila <i>et al.</i> 2011)   |
| 0.01 (-0.07, 0.09) p=0.785  | 0.2 (-0.13, 0.53) p=0.239           | 0.02 (-0.32, 0.36) p=0.915  | 0.29 (-0.05, 0.64) p=0.095  | (Knaapila <i>et al.</i> 2011)   |
| 0.02 (-0.09, 0.13) p=0.753  | 0.11 (-0.32, 0.54) p=0.601          | 0.08 (-0.36, 0.52) p=0.718  | 0.01 (-0.44, 0.47) p=0.97   | (Shigemura <i>et al.</i> 2011)  |
| 0.03 (-0.04, 0.1) p=0.429   | 0 (-0.29, 0.29) p=0.985             | 0.09 (-0.21, 0.39) p=0.546  | -0.06 (-0.36, 0.23) p=0.675 | (Pirastu <i>et al.</i> 2011)    |
| -0.01 (-0.08, 0.05) p=0.651 | -0.15 (-0.4, 0.11) p=0.255          | -0.07 (-0.34, 0.2) p=0.603  | -0.07 (-0.33, 0.19) p=0.594 | (Pirastu <i>et al.</i> 2011)    |
| 0.06 (-0.13, 0.26) p=0.524  | 0.71 (-0.12, 1.58) p=0.095          | -0.25 (-0.98, 0.47) p=0.497 | 0.74 (-0.11, 1.8) p=0.117   | (Chen <i>et al.</i> 2012)       |
| -0.1 (-0.27, 0.08) p=0.273  | -0.24 (-1.02, 0.5) p=0.537          | -0.61 (-1.32, 0.1) p=0.092  | -0.52 (-1.22, 0.19) p=0.145 | (Shigemura <i>et al.</i> 2011)  |
| -0.05 (-0.12, 0.02) p=0.184 | -0.22 (-0.5, 0.06) p=0.127          | 0.2 (-0.08, 0.48) p=0.161   | -0.04 (-0.32, 0.24) p=0.77  | (Pirastu <i>et al.</i> 2012)    |

| Variant     | Gene    | reported taste association | broccoli                            | artificial sweeteners            |
|-------------|---------|----------------------------|-------------------------------------|----------------------------------|
| rs1761667   | CD36    | fat                        | 0.01 (-0.04, 0.07) p=0.607          | -0.02 (-0.09, 0.04) p=0.487      |
| rs838133    | FGF21   | sweet                      | 0 (-0.06, 0.05) p=0.892             | -0.01 (-0.08, 0.06) p=0.774      |
| rs1421085   | FTO     | sweet                      | -0.01 (-0.07, 0.05) p=0.775         | 0.03 (-0.04, 0.1) p=0.345        |
| rs26802     | GHRL    | sweet                      | -0.02 (-0.08, 0.04) p=0.446         | 0.01 (-0.07, 0.08) p=0.817       |
| rs34911341  | GHRL    | sweet                      | 0 (1, 1) p=1                        | 0 (1, 1) p=1                     |
| rs35680     | GHRL    | sweet                      | <b>-0.07 (-0.12, -0.01) p=0.017</b> | -0.02 (-0.09, 0.04) p=0.47       |
| rs42451     | GHRL    | sweet                      | -0.02 (-0.08, 0.04) p=0.548         | 0.02 (-0.06, 0.1) p=0.612        |
| rs4684677   | GHRL    | sweet                      | -0.02 (-0.14, 0.1) p=0.73           | <b>-0.14 (-0.28, 0) p=0.047</b>  |
| rs696217    | GHRL    | sweet                      | <b>0.13 (0.03, 0.23) p=0.011</b>    | <b>0.16 (0.04, 0.28) p=0.008</b> |
| rs7792845   | GNAT3   | sweet                      | 0.01 (-0.04, 0.07) p=0.622          | -0.03 (-0.1, 0.04) p=0.411       |
| rs9276975   | HLA-DOA | wine                       | -0.06 (-0.14, 0.02) p=0.161         | 0.05 (-0.05, 0.15) p=0.341       |
| rs28757581  | OR2J3   | cis-3-hexen-1-ol           | 0.03 (-0.05, 0.12) p=0.453          | 0.04 (-0.07, 0.14) p=0.492       |
| rs9295791   | OR2J3   | cis-3-hexen-1-ol           | 0.06 (-0.03, 0.16) p=0.207          | 0.05 (-0.07, 0.16) p=0.436       |
| rs6591536   | OR5A1   | b-ionone                   | -0.02 (-0.08, 0.04) p=0.507         | -0.08 (-0.15, -0.01) p=0.03      |
| rs61729907  | OR7D4   | androstenone               | -0.02 (-0.1, 0.05) p=0.549          | 0.02 (-0.07, 0.11) p=0.637       |
| rs5020278   | ORD74   | ethanol burn               | -0.03 (-0.11, 0.04) p=0.382         | -0.01 (-0.1, 0.07) p=0.763       |
| rs34160967  | TAS1R1  | umami                      | 0.08 (-0.01, 0.17) p=0.085          | -0.03 (-0.15, 0.08) p=0.578      |
| rs3935570   | TAS1R2  | wine                       | 0.02 (-0.04, 0.09) p=0.439          | 0.01 (-0.07, 0.09) p=0.793       |
| rs4920566   | TAS1R2  | wine                       | -0.04 (-0.09, 0.02) p=0.209         | 0.03 (-0.04, 0.1) p=0.433        |
| rs111615792 | TAS1R3  | umami                      | 0.02 (-0.15, 0.19) p=0.822          | 0.01 (-0.19, 0.22) p=0.897       |
| rs307377    | TAS1R3  | umami                      | -0.02 (-0.17, 0.13) p=0.775         | 0.02 (-0.17, 0.21) p=0.834       |
| rs2277675   | TRPV1   | beets                      | <b>-0.06 (-0.12, 0) p=0.043</b>     | 0 (-0.07, 0.07) p=0.963          |

## References

- Keller KL, Liang LC, Sakimura J, May D, van Belle C, Breen C, Driggin E, Tepper BJ, Lanzano PC, Deng L, Chung WK. 2012. Common variants in the CD36 gene are associated with oral fat perception, fat preferences, and obesity in African Americans. *Obesity* 20: 1066-1073.
- Fayzullina S, Smith RP, Furlotte N, Hu Y, Hinds D, Tung JY. 2015. White Paper 23-08 Genetic Associations with Traits in 23andMe Customers.
- Landgren S, Simms JA, Thelle DS, Strandhagen E, Bartlett SE, Engel JA, Jerlhag E. 2011. The ghrelin signalling system is involved in the consumption of sweets. *PloS one* 6: e18170.
- Fushan AA, Simons CT, Slack JP, Drayna D. 2010. Association between common variation in genes encoding sweet taste signaling components and human sucrose perception. *Chemical senses: bjq063*.

- Pirastu N, Kooyman M, Traglia M, Robino A, Willems SM, Pistis G, Amin N, Sala C, Karssen LC, van Duijn CM. 2015. Genome-wide association analysis on five isolated populations identifies variants of the HLA-DOA gene associated with white wine liking. *European Journal of Human Genetics* 23: 1717-1722.
- McRae JF, Mainland JD, Jaeger SR, Adipietro KA, Matsunami H, Newcomb RD. 2012. Genetic variation in the odorant receptor OR2J3 is associated with the ability to detect the "grassy" smelling odor, cis-3-hexen-1-ol. *Chemical senses*.
- Jaeger SR, McRae JF, Bava CM, Beresford MK, Hunter D, Jia Y, Chheang SL, Jin D, Peng M, Gamble JC. 2013. A Mendelian trait for olfactory sensitivity affects odor experience and food selection. *Current Biology* 23: 1601-1605.
- Knaapila A, Hwang L-D, Lysenko A, Duke FF, Fesi B, Khoshnevisan A, James RS, Wysocki CJ, Rhyu M, Tordoff MG. 2012. Genetic analysis of chemosensory traits in human twins. *Chemical senses* 37: 869-881.
- Shigemura N, Shirosaki S, Sanematsu K, Yoshida R, Ninomiya Y. 2009. Genetic and molecular basis of individual differences in human umami taste perception. *PLoS One* 4: e6717.
- Pirastu N, Robino A, Lanzara C, Athanasakis E, Esposito L, Tepper BJ, Gasparini P. 2012. Genetics of food preferences: a first view from silk road populations. *Journal of food science* 77: S413-S418.
- Chen Q-Y, Alarcon S, Tharp A, Ahmed OM, Estrella NL, Greene TA, Rucker J, Breslin PA. 2009. Perceptual variation in umami taste and polymorphisms in TAS1R taste receptor genes. *The American journal of clinical nutrition* 90: 770S-779S.

**Supplemental Table 2. Associations of traits and alcohol consumption**

| Trait                            |                              | Perception of bitterness in:  |                                       |                                     |                                     | preference for black coffee            |
|----------------------------------|------------------------------|-------------------------------|---------------------------------------|-------------------------------------|-------------------------------------|----------------------------------------|
|                                  |                              | PTC                           | brussels sprouts                      | artificial sweeteners               | broccoli                            |                                        |
| Perception of bitterness in:     | PTC                          | NA                            | -0.01 (-0.37, 0.34)<br>p=0.938        | 0.03 (-0.3, 0.36)<br>p=0.862        | 0.28 (-0.12, 0.68)<br>p=0.169       | 0.01 (-0.2, 0.23)<br>p=0.912           |
|                                  | Brussels sprouts             | 0 (-0.05, 0.05)<br>p=0.942    | NA                                    | 0.06 (-0.02, 0.15)<br>p=0.123       | <b>0.33 (0.24, 0.43)</b><br>p<0.001 | <b>-0.06 (-0.11, -0.01)</b><br>p=0.025 |
|                                  | artificial sweeteners        | 0 (-0.05, 0.06)<br>p=0.941    | 0.07 (-0.02, 0.16)<br>p=0.123         | NA                                  | <b>0.12 (0.01, 0.23)</b><br>p=0.027 | 0.04 (-0.01, 0.1)<br>p=0.123           |
|                                  | broccoli                     | 0.03 (-0.02, 0.07)<br>p=0.232 | <b>0.25 (0.18, 0.32)</b><br>p<0.001   | <b>0.08 (0.01, 0.15)</b><br>p=0.027 | NA                                  | -0.04 (-0.09, 0)<br>p=0.055            |
|                                  | preference for black coffee  | 0.02 (-0.19, 0.23)<br>p=0.841 | <b>-0.38 (-0.73, -0.04)</b><br>p=0.03 | 0.25 (-0.07, 0.58)<br>p=0.129       | -0.37 (-0.77, 0.04)<br>p=0.076      | NA                                     |
| frequency of alcohol consumption | 0.09 (-0.12, 0.3)<br>p=0.379 | 0.16 (-0.19, 0.52)<br>p=0.371 | 0.3 (-0.04, 0.63)<br>p=0.081          | <b>0.52 (0.11, 0.94)</b><br>p=0.013 | <b>0.27 (0.06, 0.48)</b><br>p=0.013 |                                        |
