# Supplementary material for: Complex relationship between TAS2 receptor variations, bitterness perception, and alcohol consumption observed in a population of wine consumers
Source: Royal Society of Chemistry journal article supplement (doi:10.1039/c8fo01578c), 2019-01-01
Supplement: c8fo01578c2.xlsx [file c8fo01578c2.xlsx]

## Sheet: supplementary material- survey
Research Survey: Part I
Q1. I ACKNOWLEDGE THAT I HAVE READ THE INFORMED CONSENT AND WAIVER DOCUMENT LOCATED HERE, AND AGREE TO ITS TERMS. I HAVE VOLUNTEERED TO PARTICIPATE IN THE STUDY AND HAVE HAD THE OPPORTUNITY TO ASK ANY QUESTIONS I MIGHT HAVE ABOUT THE STUDY OR VINOME’S USE OF DATA I PROVIDE OR THAT IS GENERATED BY VINOME. I FURTHER UNDERSTAND THAT BY ELECTRONICALLY SIGNING THIS CONSENT AND WAIVER, I VOLUNTARILY SU…
Q2. Please type your first name
Q3. Please type your last name
Q4. Please enters today's date
Q5. Please enter your email address (be sure to use this same email address at the tasting party)
Q6. I really like [Choose all that apply]
Answer Choices
Cherries
Blackberries
Apples/pears
Peaches
Grapefruit
Lemons/limes
Tropical fruits (mango, pineapple)
The smell of cut grass
Beets
Exotic earthy mushrooms
Broccoli
Brussels sprouts
Black coffee
The smell of leather
Sugar or other sweeteners in my coffee
Flavored coffee beans or flavored creamers in my coffee
Adding salt to my food
Cilantro
Salty snacks
Savory (Umami) flavors
Pungent cheeses (blue, gorgonzola)
Sweet desserts
I don't really like any of these
Q7. I really dislike [Choose all that apply]
Answer Choices
Cherries
Blackberries
Apples/pears
Peaches
Grapefruit
Lemons/limes
Tropical fruits (mango, pineapple)
The smell of cut grass
Beets
Exotic earthy mushrooms
Broccoli
Brussels sprouts
Black coffee
The smell of leather
Sugar or other sweeteners in my coffee
Flavored coffee beans or flavored creamers in my coffee
Adding salt to my food
Cilantro
Salty snacks
Savory (Umami) flavors
Pungent cheeses (blue, gorgonzola)
Sweet desserts
I don't dislike any of these
Q8. Please describe your level of agreement with the following statements
Cilantro tastes unpleasant or soapy to me
Artificial sweeteners (ie. aspartame, Equal, Sweet'N Low, Splenda) taste unpleasant or bitter to me
Broccoli tastes unpleasant or bitter to me
Brussels sprouts taste unpleasant or bitter to me
Q9. When snacking, are you more likely to eat something savory or sweet?
Answer Choices
Savory
Sweet
No preference
Q10. Which of the following cheeses do you enjoy the most? (Choose up to three)
Answer Choices
American
Provolone
Swiss
Cheddar (mild or medium)
Cheddar (sharp)
Parmesan
Blue/gorgonzola cheese
Pepperjack
Brie
Goat cheese
Feta
Other (please specify)
Q11. Which of the following spices do you enjoy most? [Choose up to three]
Answer Choices
Nutmeg
Mint
Cinnamon
Vanilla
Pepper
Dill
Curry
Garlic
Sage
None of the above
Q12. How often do you eat out at restaurants (not including fast food)?
Answer Choices
Frequently (one or more times a week)
Sometimes (one to three times a month)
Rarely (less than once a month)
Q13. Do you ever drink alcoholic beverages?
Answer Choices
Yes
No
Q14. How often do you drink alcoholic beverages?
Answer Choices
More than 7 drinks per week
2-7 drinks per week
Less than 2 drinks per week
Q15. How often do you drink wine?
Answer Choices
More than 7 glasses per week
2-7 glasses per week
Less than 2 glasses per week
Q16. In general, do you drink mostly beer, wine, or cocktails? [Choose one]
Answer Choices
Beer
Wine
Cocktails
Q17. When you drink liquor or cocktails, what are your favorites (choose at least one liquor and preparation)
Most preferred liquor type
2nd most preferred liquor type
3rd most preferred liquor type
Other (please specify liquor type and any additives/mixers)
Most preferred preparation/mixer
Most preferred liquor type
2nd most preferred liquor type
3rd most preferred liquor type
Other (please specify liquor type and any additives/mixers)
2nd most preferred preparation/mixer
Most preferred liquor type
2nd most preferred liquor type
3rd most preferred liquor type
Other (please specify liquor type and any additives/mixers)
Q18. When you drink beer, which type would you most likely drink? [Choose one]
Answer Choices
Light beer (ie. Bud light, Coors light)
Indian Pale Ale (ie. IPA)
Wheat beer (ie. Hefeweizen, Blue Moon)
Dark beer (ie.Dark Stout, Guiness)
Hard fruit cider (ie. Angry Orchard, Woodchuck)
I never drink beer
Q19. Which of the following best describes your feelings about wine? [Choose all that apply]
Answer Choices
I consider myself educated about wine
I wish I knew more about wine
Wine ratings are important to me when choosing wine
I know what wines I like and tend to stick with them
I love trying new wines
I find choosing wines overwhelming
Other ways you describe yourself in relation to wine
Q20. Which of the following best describes your feelings about wine?
Answer Choices
I only drink white wines
I prefer white wine over red, but I will drink some red wine
I like white and red wines equally
I prefer red wine over white, but I will drink some white wine
I only drink red wines
I don't like red or white wines
Q21. What don't you like about white wine? [Choose all that apply]
Answer Choices
Too sweet
Too fruity
Too mellow
Too acidic
Too bitter
Too dry
Too "oaky"
Other reasons (please specify)
Q22. What don't you like about red wine? [Choose all that apply]
Answer Choices
Too jammy
Too bold
Too "oaky"
Too acidic
Too bitter
Too dry
Too earthy
Other reasons (please specify)
Q23. What are your top 3 favorite wine varietals? [Choose three]
Answer Choices
Moscot(o)/ Ice wine
Gewürztraminer
Riesling
Sweet sparkling
Champagne/Dry sparkling
Pinot grigio
Viognier
Sauvignon blanc
Chardonnay
White zinfandel
Rose/Blush
Pinot noir
Merlot
Zinfandel
Shiraz/Syrah
Cabernet sauvignon
Malbec
Bordeaux blend
Grenache/Rhone blend
I never drink wine
Other (please specify only one wine)
Q24. Would you say that you prefer lighter or full bodied wines?
Answer Choices
Light
Full bodied
Huh?
Q25. Would you say that you prefer sweet and fruity wines, or wines with oak and earthy flavors?
Answer Choices
Sweet and fruity
Oak and earthy
What are you talking about?
Q26. Do you smoke cigarettes?
Answer Choices
Yes, I currently smoke cigarettes
No, I have never smoked cigarettes
I used to smoke cigarettes but I no longer do. Years smoked
Q27. In the past 30 days, have you smoked or used? [Choose all that apply]
Answer Choices
Cigarette
E-cigarette
Cigar
Tobacco pipe
Smokeless tobacco
Hookah
No, none of the above
Q28. Which category below includes your age?
Answer Choices
under 21
21-30
31-40
41-50
51-60
60 or older
Decline to answer
Q29. What is your gender?
Answer Choices
Male
Female
I identify as
Q30. What is the highest level of school you have completed or the highest degree you have received?
Answer Choices
Less than high school degree
High school degree or equivalent (e.g., GED)
Some college but no degree
Associate degree
Bachelor degree
Graduate degree
Decline to answer
Q31. What was your total combined household income last year?
Answer Choices
Less than $20,000
$20,000 to $34,999
$35,000 to $49,999
$50,000 to $74,999
$75,000 to $99,999
$100,000 to $149,999
$150,000 to $200,000
$201,000 or more
Decline to answer
Q32. In which region of the United States do you live?
Answer Choices
New England (Maine, New Hampshire, Vermont, Massachusetts, Rhode Island, Connecticut)
Middle Atlantic (New York, New Jersey, Pennsylvania)
East North Central (Ohio, Indiana, Illinois, Michigan, Wisconsin)
West North Central (Minnesota, Iowa, Missouri, North Dakota, South Dakota, Nebraska, Kansas)
South Atlantic (Delaware, Maryland, District of Columbia, Virginia, West Virginia, North Carolina, South Carolina, Georgia, Florida)
East South Central (Kentucky, Tennessee, Alabama, Mississippi)
West South Central (Arkansas, Louisiana, Oklahoma, Texas)
Mountain (Montana, Idaho, Wyoming, Colorado, New Mexico, Arizona, Utah, Nevada)
Pacific (Washington, Oregon, California, Alaska, Hawaii)
Decline to answer
Q33. What is your ethnicity? [Choose all that apply]
Answer Choices
White
Black or African-American
American Indian or Alaskan Native
Asian
Native Hawaiian or other Pacific Islander
Decline to answer
Other (please specify)
Part II
Q4. Which of the following do you perceive in wine #1? (Select all)
Answer Choices
Stone fruit (peach, nectarine)
Green apple
Honeysuckle
Citrus (lemon, lime, grapefruit)
Tropical fruit (pineapple, mango, guava)
Cut grass
Fresh herbs
Minerals
Oak
Vanilla
Butterscotch
Marmalade
Toasted nut
Other (please specify)
Q5. What is your opinion about wine #1 overall? (Choose one)
Answer Choices
I love this wine
I like this wine
I'm neutral about this wine
I don't like this wine very much
I don't like this wine at all
Q6. What do you like about wine #1? (Select all)
Answer Choices
Its sweetness
Its fruit
Its smoothness
Its boldness
Its acidity
Its tannin (dryness)
Its oak
Its butter
Its earthiness
Nothing, I don't really like this wine
Other (please specify)
Q7. What do you NOT like about wine #1? (Select all)
Answer Choices
Too sweet
Too fruity
Too mellow
Too bitter
Too acidic
Too dry
Too bold
Too much oak
Too earthy
Nothing, I like this wine
Other (please specify)
Q8. Which of the following do you perceive in wine #2?
Answer Choices
Stone fruit (peach, nectarine)
Green apple
Honeysuckle
Citrus (lemon, lime, grapefruit)
Tropical fruit (pineapple, mango, guava)
Cut grass
Fresh herbs
Minerals
Oak
Vanilla
Butterscotch
Marmalade
Toasted nut
Other (please specify)
Q9. What is your opinion about wine #2 overall?
Answer Choices
I love this wine
I like this wine
I'm neutral about this wine
I don't like this wine very much
I don't like this wine at all
Q10. What do you like about wine #2?
Answer Choices
Its sweetness
Its fruit
Its smoothness
Its boldness
Its acidity
Its tannin (dryness)
Its oak
Its butter
Its earthiness
Nothing, I don't really like this wine
Other (please specify)
Q11. What do you not like about wine #2?
Answer Choices
Too sweet
Too fruity
Too mellow
Too bitter
Too acidic
Too dry
Too bold
Too much oak
Too earthy
Nothing, I like this wine
Other (please specify)
Q12. Which of the following do you perceive in wine #3?
Answer Choices
Stone fruit (peach, nectarine)
Green apple
Honeysuckle
Citrus (lemon, lime, grapefruit)
Tropical fruit (pineapple, mango, guava)
Cut grass
Fresh herbs
Minerals
Oak
Vanilla
Butterscotch
Marmalade
Toasted nut
Other (please specify)
Q13. What is your opinion about wine #3?
Answer Choices
I love this wine
I like this wine
I'm neutral about this wine
I don't like this wine very much
I don't like this wine at all
Q14. What do you like about wine #3?
Answer Choices
Its sweetness
Its fruit
Its smoothness
Its boldness
Its acidity
Its tannin (dryness)
Its oak
Its butter
Its earthiness
Nothing, I don't really like this wine
Other (please specify)
Q15. What do you not like about wine #3?
Answer Choices
Too sweet
Too fruity
Too mellow
Too bitter
Too acidic
Too dry
Too bold
Too much oak
Too earthy
Nothing, I like this wine
Other (please specify)
Q16. Now taste wines #2 and #3 again. Which one do you like better? (Choose one)
Answer Choices
Wine #2
Wine #3
I like them both the same
I don't like either of them
Q17. Which of the following do you perceive in wine #4?
Answer Choices
Stone fruit (peach, nectarine)
Green apple
Honeysuckle
Citrus (lemon, lime, grapefruit)
Tropical fruit (pineapple, mango, guava)
Cut grass
Fresh herbs
Minerals
Oak
Vanilla
Butterscotch
Marmalade
Toasted nut
Other (please specify)
Q18. What is your opinion about wine #4 overall?
Answer Choices
I love this wine
I like this wine
I'm neutral about this wine
I don't like this wine very much
I don't like this wine at all
Q19. What do you like about wine #4?
Answer Choices
Its sweetness
Its fruit
Its smoothness
Its boldness
Its acidity
Its tannin (dryness)
Its oak
Its butter
Its earthiness
Nothing, I don't really like this wine
Other (please specify)
Q20. What do you not like about wine #4?
Answer Choices
Too sweet
Too fruity
Too mellow
Too bitter
Too acidic
Too dry
Too bold
Too much oak
Too earthy
Nothing, I like this wine
Other (please specify)
Q21. Which of the following do you perceive in wine #5?
Answer Choices
Stone fruit (peach, nectarine)
Green apple
Honeysuckle
Citrus (lemon, lime, grapefruit)
Tropical fruit (pineapple, mango, guava)
Cut grass
Fresh herbs
Minerals
Oak
Vanilla
Butterscotch
Marmalade
Toasted nut
Other (please specify)
Q22. What is your opinion about wine #5 overall?
Answer Choices
I love this wine
I like this wine
I'm neutral about this wine
I don't like this wine very much
I don't like this wine at all
Q23. What do you like about wine #5?
Answer Choices
Its sweetness
Its fruit
Its smoothness
Its boldness
Its acidity
Its tannin (dryness)
Its oak
Its butter
Its earthiness
Nothing, I don't really like this wine
Other (please specify)
Q24. What do you not like about wine #5?
Answer Choices
Too sweet
Too fruity
Too mellow
Too bitter
Too acidic
Too dry
Too bold
Too much oak
Too earthy
Nothing, I like this wine
Other (please specify)
Q25. Which of the following do perceive in wine #6?
Answer Choices
Stone fruit (peach, nectarine)
Green apple
Honeysuckle
Citrus (lemon, lime, grapefruit)
Tropical fruit (pineapple, mango, guava)
Cut grass
Fresh herbs
Minerals
Oak
Vanilla
Butterscotch
Marmalade
Toasted nut
Other (please specify)
Q26. What is your opinion about wine #6 overall?
Answer Choices
I love this wine
I like this wine
I'm neutral about this wine
I don't like this wine very much
I don't like this wine at all
Q27. What do you like about wine #6?
Answer Choices
Its sweetness
Its fruit
Its smoothness
Its boldness
Its acidity
Its tannin (dryness)
Its oak
Its butter
Its earthiness
Nothing, I don't really like this wine
Other (please specify)
Q28. What do you not like about wine #6?
Answer Choices
Too sweet
Too fruity
Too mellow
Too bitter
Too acidic
Too dry
Too bold
Too much oak
Too earthy
Nothing, I like this wine
Other (please specify)
Q29. Now taste wines #4 and #6 again. Which one do you like better?
Answer Choices
Wine #4
Wine #6
I like them both the same
I don't like either of them
Q30. Which of the following do you perceive in wine #7?
Answer Choices
Plum
Cherry
Raspberry
Blackberry
Espresso
Smoke
Spice
Licorice
Earthy mushroom
Leather
Tobacco
Chocolate
Meat
Other (please specify)
Q31. What is your opinion about wine #7 overall?
Answer Choices
I love this wine
I like this wine
I'm neutral about this wine
I don't like this wine very much
I don't like this wine at all
Q32. What do you like about wine #7?
Answer Choices
Its sweetness
Its fruit
Its smoothness
Its boldness
Its acidity
Its tannin (dryness)
Its oak
Its butter
Its earthiness
Nothing, I don't really this wine
Other (please specify)
Q33. What do you not like about wine #7?
Answer Choices
Too sweet
Too fruity
Too mellow
Too bitter
Too acidic
Too dry
Too bold
Too much oak
Too earthy
Nothing, I like this wine
Other (please specify)
Q34. Which of the following do you perceive in wine #8?
Answer Choices
Plum
Cherry
Raspberry
Blackberry
Espresso
Smoke
Spice
Licorice
Earthy mushroom
Leather
Tobacco
Chocolate
Meat
Other (please specify)
Q35. What is your opinion about wine #8 overall?
Answer Choices
I love this wine
I like this wine
I'm neutral about this wine
I don't like this wine very much
I don't like this wine at all
Q36. What do you like about wine #8?
Answer Choices
Its sweetness
Its fruit
Its smoothness
Its boldness
Its acidity
Its tannin (dryness)
Its oak
Its butter
Its earthiness
Nothing, I don't really like this wine
Other (please specify)
Q37. What do you not like about wine #8?
Answer Choices
Too sweet
Too fruity
Too mellow
Too bitter
Too acidic
Too dry
Too bold
Too much oak
Too earthy
Nothing, I like this wine
Other (please specify)
Q38. Now taste wines #7 and #8 again. Which one do you like better?
Answer Choices
Wine #7
Wine #8
I like them both the same
I don't like either of them
Q39. Which of the following do you perceive in wine #9?
Answer Choices
Plum
Cherry
Raspberry
Blackberry
Espresso
Smoke
Spice
Licorice
Earthy mushroom
Leather
Tobacco
Chocolate
Meat
Other (please specify)
Q40. What is your opinion about wine #9 overall?
Answer Choices
I love this wine
I like this wine
I'm neutral about this wine
I don't like this wine very much
I don't like this wine at all
Q41. What do you like about wine #9?
Answer Choices
Its sweetness
Its fruit
Its smoothness
Its boldness
Its acidity
Its tannin (dryness)
Its oak
Its butter
Its earthiness
Nothing, I don't really like this wine
Other (please specify)
Q42. What do you not like about wine #9?
Answer Choices
Too sweet
Too fruity
Too mellow
Too bitter
Too acidic
Too dry
Too bold
Too much oak
Too earthy
Nothing, I like this wine
Other (please specify)
Q43. Which of the following do you perceive in wine #10?
Answer Choices
Plum
Cherry
Raspberry
Blackberry
Espresso
Smoke
Spice
Licorice
Earthy mushroom
Leather
Tobacco
Chocolate
Meat
Other (please specify)
Q44. What is your opinion about wine #10 overall?
Answer Choices
I love this wine
I like this wine
I'm neutral about this wine
I don't like this wine very much
I don't like this wine at all
Q45. What do you like about wine #10?
Answer Choices
Its sweetness
Its fruit
Its smoothness
Its boldness
Its acidity
Its tannin (dryness)
Its oak
Its butter
Its earthiness
Nothing, I don't really like this wine
Other (please specify)
Q46. What do you not like about wine #10?
Answer Choices
Too sweet
Too fruity
Too mellow
Too bitter
Too acidic
Too dry
Too bold
Too much oak
Too earthy
Nothing, I like this wine
Other (please specify)
Q47. Which of the following do you perceive in wine #11?
Answer Choices
Plum
Cherry
Raspberry
Blackberry
Espresso
Smoke
Spice
Licorice
Earthy mushroom
Leather
Tobacco
Chocolate
Meat
Other (please specify)
Q48. What is your opinion about wine #11 overall?
Answer Choices
I love this wine
I like this wine
I'm neutral about this wine
I don't like this wine very much
I don't like this wine at all
Q49. What do you like about wine #11?
Answer Choices
Its sweetness
Its fruit
Its smoothness
Its boldness
Its acidity
Its tannin (dryness)
Its oak
Its butter
Its earthiness
Nothing, I don't really like this wine
Other (please specify)
Q50. What do you not like about wine #11?
Answer Choices
Too sweet
Too fruity
Too mellow
Too bitter
Too acidic
Too dry
Too bold
Too much oak
Too earthy
Nothing, I like this wine
Other (please specify)
Q51. Which of the following do you perceive in wine #12?
Answer Choices
Plum
Cherry
Raspberry
Blackberry
Espresso
Smoke
Spice
Licorice
Earthy mushroom
Leather
Tobacco
Chocolate
Meat
Other (please specify)
Q52. What is your opinion about wine #12 overall?
Answer Choices
I love this wine
I like this wine
I'm neutral about this wine
I don't like this wine very much
I don't like this wine at all
Q53. What do you like about wine #12?
Answer Choices
Its sweetness
Its fruit
Its smoothness
Its boldness
Its acidity
Its tannin (dryness)
Its oak
Its butter
Its earthiness
Nothing, I didn't really like this wine
Other (please specify)
Q54. What do you not like about wine #12?
Answer Choices
Too sweet
Too fruity
Too mellow
Too bitter
Too acidic
Too dry
Too bold
Too much oak
Too earthy
Nothing, I like this wine
Other (please specify)
Q55. Now taste wines #11 and #12 again. Which one do you like better?
Answer Choices
Wine #11
Wine #12
I like them both the same
I don't like either of them
Q56. Touch tasting strip #1 to your tongue and get a good taste. What do you taste?
Answer Choices
Slightly sweet
Slightly salty
Slightly bitter
I don't taste anything
Very sweet
Very salty
Very bitter
Q57. Touch tasting strip #2 to your tongue and get a good taste. What do you taste?
Answer Choices
Slightly sweet
Slightly salty
Slightly bitter
I don't taste anything
Very sweet
Very salty
Very bitter
